# Supplementary material
Source: PubMed Central journal article supplement (PMC2955873)
Supplement: supp_jn.110.127084_nut127084ST1.pdf [file supp_jn.110.127084_nut127084ST1.pdf]

## Online Supporting Material

**Supplemental Table 1:** High saturated fat diet composition  
Harlan Tekklad Adjusted Calories Diet (TD 88137, 18.84 MJ/kg energy)

---

|                                                |                    |                 |
|------------------------------------------------|--------------------|-----------------|
|                                                | g/kg               |                 |
| Casein                                         | 195.0              |                 |
| DL-methionine                                  | 3.0                |                 |
| Sucrose                                        | 341.5              |                 |
| Corn starch                                    | 150                |                 |
| Anhydrous milk fat                             | 210                |                 |
| Cholesterol                                    | 1.5                |                 |
| Cellulose                                      | 50.0               |                 |
| Mineral mix (AIN-76, 170915)                   | 35                 |                 |
| Calcium carbonate                              | 4.0                |                 |
| Vitamin mix Teklad (40060)                     | 10.0               |                 |
| Ethoxyquin antioxidant                         | 0.04               |                 |
|                                                | <b>% by weight</b> | <b>% energy</b> |
| Protein                                        | 17.3               | 15.2            |
| Carbohydrate                                   | 42.7               | 42.7            |
| Fat (includes 0.2% by weight from cholesterol) | 21.2               | 42.0            |

---
