# Supplementary material
Source: PubMed Central journal article supplement (PMC2955873)
Supplement: supp_jn.110.127084_nut127084ST2.pdf [file supp_jn.110.127084_nut127084ST2.pdf]

## Online Supporting Material

**Supplemental Table 2:** qRT-PCR primers

| Gene name                            | Forward primer                                             | Reverse primer                                    |
|--------------------------------------|------------------------------------------------------------|---------------------------------------------------|
| <i>Abcg5</i> (27409) <sup>1</sup>    | forward, 5'-TTG CGA TAC<br>ACA GCG ATG CT-3'               | reverse, 5'-TGA CTG CCT<br>CTA CCT TCT TGT TGT-3' |
| <i>Dgat1</i> (13350) <sup>1</sup>    | forward, 5'-TCC GCC TCT<br>GGG CAT TC-3'                   | reverse, 5'-GAA TCG GCC<br>CAC AAT CCA-3'         |
| <i>Dgat2</i> (67800) <sup>1</sup>    | forward, 5'-AGA ACC GCA<br>AAG GCT TTG TG-3'               | reverse, 5'-AGG AAT AAG<br>TGG GAA CCA GAT CAG-3' |
| <i>Mttp</i> (17777) <sup>1</sup>     | forward, 5'-ATG ATC CTC<br>TTG GCA GTG CTT-3'              | reverse, 5'-TGA GAG GCC<br>AGT TGT GTG AC-3'      |
| <i>Npc111</i> (237636) <sup>1</sup>  | forward, 5'-CCA CAG ACC<br>CTG TGG AAC TG-3'               | reverse, 5'-GCT CGT CAT<br>GGA AAG CCT TT-3'      |
| <i>C/ebpβ</i> : (12608) <sup>1</sup> | forward, 5'-AAG CTG AGC<br>GAC GAG GTA CAA GA-3';          | reverse, 5'-GTC AGC TCC<br>AGC ACC TTG TG-3'      |
| <i>Cyp4a14</i> (13119) <sup>1</sup>  | forward, 5'-CCC CTC TAG<br>ATT TGC ACC AGA T-3'            | reverse, 5'-TCC CAA TGC<br>AGT TCC TTG ATC -3'    |
| <i>Lpin1</i> (14245) <sup>1</sup>    | forward, 5'-CCA CTT CCA<br>TGC TTC GGA AA-3'               | reverse, 5'-GGT TAT TCT<br>TTG GCG TCA ACC T-3'   |
| <i>Cd36</i> (12491) <sup>1</sup>     | forward, 5'-GGT CCT TAC<br>ACA TAC AGA GTT CGT<br>TAT C-3' | reverse, 5'-CAT TGG GCT<br>GTA CAA AAG ACA CA-3'  |
| <i>Tis7</i> (15982) <sup>1</sup>     | forward, 5'-CGC TGT CTG<br>AAA AAA GGA AAG AGT-3'          | reverse, 5'-GGC CCA GCT<br>GAA TAC AAA GAA C-3'   |
| <i>Igfbp1</i> (16006) <sup>1</sup>   | forward, 5'-CCA TCA GCA<br>CCT ATA GCA GCA T-3'            | reverse, 5'-TGG CAG GGC<br>TCC TTC CA-3';         |

<sup>1</sup> Database identifier number from National Center for Biotechnology Information (NCBI) Entrez Gene (<http://www.ncbi.nlm.nih.gov/sites/entrez?db=gene>)
