# Supplementary material
Source: PubMed Central journal article supplement (PMC2955873)
Supplement: supp_jn.110.127084_nut127084ST3.pdf [file supp_jn.110.127084_nut127084ST3.pdf]

## Online Supporting Material

### Supplemental Table 3: Liquid rodent diet composition

AIN-93M Purified Control Liquid Rodent Diet (Dyets 710080, 16.74 MJ/L energy)

|                      | <b>G/L</b> |
|----------------------|------------|
| Casein               | 38.7       |
| Sucrose              | 27.7       |
| Cellulose            | 13.8       |
| Maltose Dextrin      | 165.7      |
| Soybean oil          | 11.1       |
| T-Butylhydroquinone  | 0.002      |
| Salt mix (210052)    | 9.68       |
| Vitamin mix (310025) | 2.77       |
| L-cystine            | 0.5        |
| Choline bitartrate   | 0.69       |
| Xanthum gum          | 3.0        |
