# Supplementary material
Source: PubMed Central journal article supplement (PMC2955873)
Supplement: supp_jn.110.127084_nut127084ST4.pdf [file supp_jn.110.127084_nut127084ST4.pdf]

## Online supporting material:

**Supplemental Table 4:** Food consumption, activity, fecal fat, basal metabolic rate and body composition analyses in *Tis7<sup>-/-</sup>* or wild type mice measured after 8 wk on high saturated fat diet (experiment 1)<sup>1</sup>.

|                                                        | WT          | <i>Tis7<sup>-/-</sup></i> |
|--------------------------------------------------------|-------------|---------------------------|
| Food, g/d                                              | 2.31±0.27   | 2.37±0.47                 |
| Activity, %                                            | 59.45±19.93 | 49.67±18.05               |
| Fecal fat, %                                           | 5.36±0.01   | 5.38±0.01                 |
| VO <sub>2</sub> , mL·g <sup>-1</sup> ·h <sup>-1</sup>  | 6.73±0.32   | 6.93±0.21                 |
| VCO <sub>2</sub> , mL·g <sup>-1</sup> ·h <sup>-1</sup> | 5.69±0.42   | 5.66±0.07                 |
| RER <sup>2</sup>                                       | 0.85±0.04   | 0.82±0.02                 |
| Fat mass, g                                            | 11.83±0.67  | 4.85±0.31*                |
| Lean mass, g                                           | 21.66±0.59  | 22.85±0.86                |

<sup>1</sup>For all experiments, n = 5 WT and n = 5 *Tis7<sup>-/-</sup>* mice, and data are expressed as means ±SEM.

\**P*<0.0001 *Tis7<sup>-/-</sup>* mice are different from control (WT).

<sup>2</sup>RER, respiratory exchange ratio .
